# Supplementary material for: A Bibliometric Analysis of Research Progress and Trends on Fly Ash-Based Geopolymer
Source: MDPI journal article supplement (doi:10.3390/ma15144777), 2022-07-07
Supplement: s1 [file s1]

# A bibliometric analysis of research progress and trends on fly ash-based geopolymers

Quanzhi Tian <sup>a</sup>, Yinhai Pan <sup>a, b</sup>, Yingchu Bai <sup>a, b</sup>, Shuo Yao <sup>a, b</sup>, Shiqiang Sun <sup>c \*</sup>

<sup>a</sup> National Engineering Research Center of Coal Preparation and Purification, China University of Mining and Technology, Xuzhou 221116, China

<sup>b</sup> School of Chemical Engineering and Technology, China University of Mining and Technology, Xuzhou 221116, China

<sup>c</sup> School of Environmental Science and Engineering, Tongji University, Shanghai 200092, China

\* Corresponding author

E-mail: cumtssq@163.com (S. Sun)

## Top 20 Keywords with the Strongest Citation Bursts

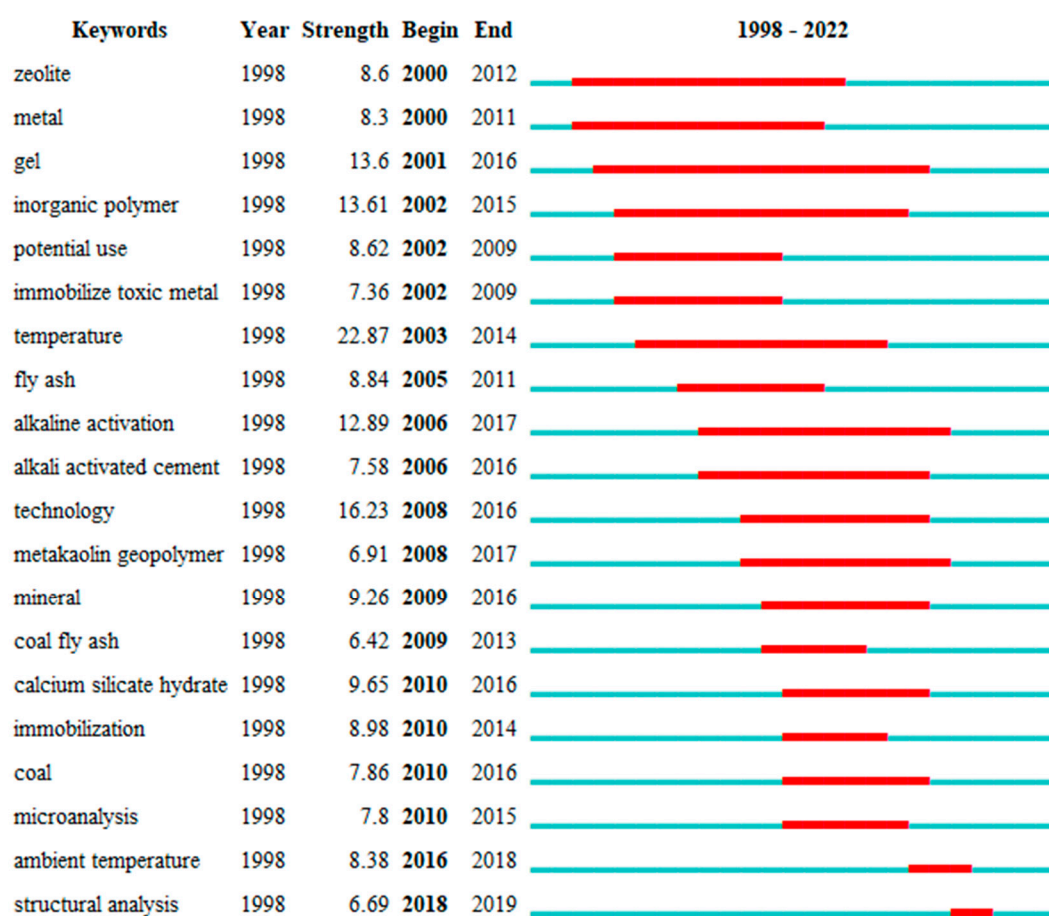

Figure S1. Strongest citation burst of keywords analysis.

## Top 25 Cited Journals with the Strongest Citation Bursts

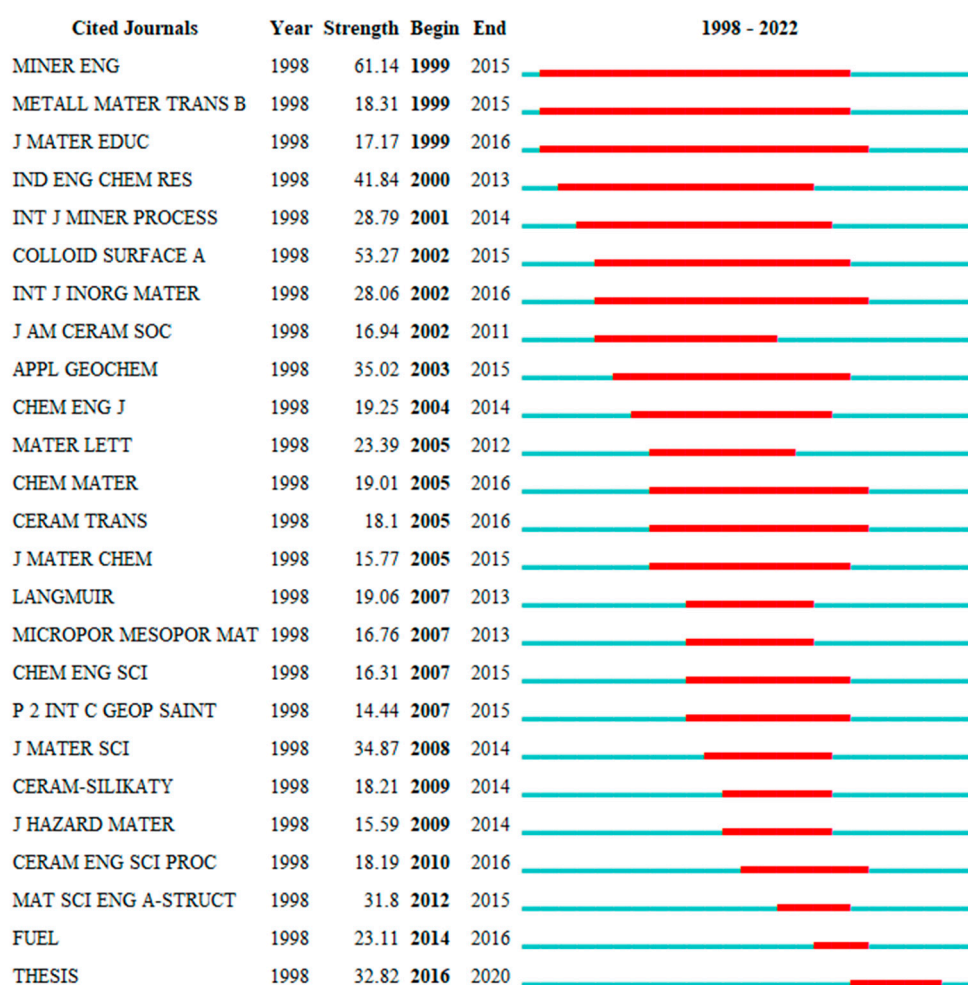

Figure S2. Strongest citation burst of journal co-citation analysis.

Table S1. Distribution of scientific publications of fly ash-based geopolymer in WoS database between 1998-2022.

| <b>Year</b> | <b>Total<br/>publications</b> | <b>Proportion (%)</b> |
|-------------|-------------------------------|-----------------------|
| 1998        | 1                             | 0.02                  |
| 1999        | 1                             | 0.02                  |
| 2000        | 1                             | 0.02                  |
| 2001        | 2                             | 0.05                  |
| 2002        | 6                             | 0.14                  |
| 2003        | 4                             | 0.10                  |
| 2004        | 8                             | 0.19                  |
| 2005        | 11                            | 0.26                  |
| 2006        | 8                             | 0.19                  |
| 2007        | 27                            | 0.65                  |
| 2008        | 19                            | 0.45                  |
| 2009        | 35                            | 0.84                  |
| 2010        | 47                            | 1.12                  |
| 2011        | 54                            | 1.29                  |
| 2012        | 83                            | 1.98                  |
| 2013        | 128                           | 3.06                  |
| 2014        | 157                           | 3.75                  |
| 2015        | 189                           | 4.52                  |
| 2016        | 262                           | 6.26                  |
| 2017        | 303                           | 7.24                  |
| 2018        | 440                           | 10.52                 |
| 2019        | 514                           | 12.29                 |
| 2020        | 709                           | 16.95                 |
| 2021        | 915                           | 21.87                 |
| 2022        | 259                           | 6.19                  |

Table S2. Top 20 categories in the field of fly ash-based geopolymer in 1998-2022.

| Ranking | Category                                              | Count | Contribution (%) |
|---------|-------------------------------------------------------|-------|------------------|
| 1       | MATERIALS SCIENCE                                     | 2507  | 16.00            |
| 2       | ENGINEERING                                           | 2085  | 13.31            |
| 3       | CONSTRUCTION & BUILDING<br>TECHNOLOGY                 | 1646  | 10.50            |
| 4       | MATERIALS SCIENCE,<br>MULTIDISCIPLINARY WE SCIENCE CI | 1640  | 10.47            |
| 5       | ENGINEERING, CIVIL                                    | 1223  | 7.81             |
| 6       | ENVIRONMENTAL SCIENCES & ECOLOGY                      | 468   | 2.99             |
| 7       | CHEMISTRY                                             | 445   | 2.84             |
| 8       | ENVIRONMENTAL SCIENCES WE SCIENCE<br>CITATION INDEX E | 407   | 2.60             |
| 9       | MATERIALS SCIENCE,<br>MULTIDISCIPLINARY               | 386   | 2.46             |
| 10      | SCIENCE & TECHNOLOGY - OTHER TOPICS                   | 381   | 2.43             |
| 11      | ENGINEERING, ENVIRONMENTAL                            | 338   | 2.16             |
| 12      | PHYSICS                                               | 290   | 1.85             |
| 13      | CHEMISTRY, PHYSICAL                                   | 288   | 1.84             |
| 14      | GREEN & SUSTAINABLE SCIENCE &<br>TECHNOLOGY           | 278   | 1.77             |
| 15      | METALLURGY & METALLURGICAL<br>ENGINEERING             | 259   | 1.65             |
| 16      | MATERIALS SCIENCE, CERAMICS WE<br>SCIENCE CITATION IN | 242   | 1.54             |
| 17      | ENGINEERING, CIVIL WE SCIENCE<br>CITATION INDEX EXPAN | 237   | 1.51             |
| 18      | PHYSICS, CONDENSED MATTER WE<br>SCIENCE CITATION INDE | 198   | 1.26             |
| 19      | PHYSICS, APPLIED                                      | 193   | 1.23             |
| 20      | MATERIALS SCIENCE, COMPOSITES WE<br>SCIENCE CITATION  | 190   | 1.21             |

Table S3. Top 20 cited authors in scientific publications on fly ash-based geopolymer.

| Ranking | Cited Authors       | Count | Centrality | Contribution (%) |
|---------|---------------------|-------|------------|------------------|
| 1       | Davidovits J        | 1943  | 0.15       | 6.83             |
| 2       | Duxson P            | 1732  | 0.06       | 6.09             |
| 3       | PROVIS JL           | 1146  | 0.1        | 4.03             |
| 4       | Fernandez-Jimenez A | 1003  | 0.1        | 3.53             |
| 5       | PALOMO A            | 919   | 0.04       | 3.23             |
| 6       | Bakharev T          | 899   | 0.13       | 3.16             |
| 7       | Chindaprasirt P     | 861   | 0.03       | 3.03             |
| 8       | Hardjito D          | 686   | 0.11       | 2.41             |
| 9       | Xu H                | 677   | 0.06       | 2.38             |
| 10      | Zhang ZH            | 641   | 0.01       | 2.25             |
| 11      | Temuujin J          | 617   | 0.01       | 2.17             |
| 12      | Van Jaarsveld JGS   | 581   | 0.07       | 2.04             |
| 13      | Bernal SA           | 580   | 0.01       | 2.04             |
| 14      | ASTM                | 545   | 0          | 1.92             |
| 15      | Puertas F           | 520   | 0.05       | 1.83             |
| 16      | Pacheco-Torgal F    | 514   | 0.03       | 1.81             |
| 17      | Lee WKW             | 486   | 0.11       | 1.71             |
| 18      | Nath P              | 482   | 0.01       | 1.69             |
| 19      | YIP CK              | 450   | 0.08       | 1.58             |
| 20      | Criado M            | 434   | 0.02       | 1.53             |

Table S4. Top 20 cited journals in scientific publications on fly ash-based geopolymer.

| Ranking | Cited Journals       | Count | Year | Centrality |
|---------|----------------------|-------|------|------------|
| 1       | CONSTR BUILD MATER   | 3261  | 2009 | 0.05       |
| 2       | CEMENT CONCRETE RES  | 3209  | 2000 | 0.07       |
| 3       | CEMENT CONCRETE COMP | 2668  | 2004 | 0.11       |
| 4       | J MATER SCI          | 2277  | 2000 | 0.03       |
| 5       | J CLEAN PROD         | 1912  | 2012 | 0.01       |
| 6       | J HAZARD MATER       | 1638  | 2005 | 0.03       |
| 7       | CERAM INT            | 1580  | 2007 | 0          |
| 8       | MATER DESIGN         | 1465  | 2011 | 0.02       |
| 9       | FUEL                 | 1350  | 2000 | 0.02       |
| 10      | APPL CLAY SCI        | 1261  | 2009 | 0.03       |
| 11      | J AM CERAM SOC       | 1231  | 2000 | 0.01       |
| 12      | J MATER CIVIL ENG    | 1212  | 2005 | 0.02       |
| 13      | MATER STRUCT         | 1192  | 2005 | 0.02       |
| 14      | MINER ENG            | 1093  | 1999 | 0.01       |
| 15      | COLLOID SURFACE A    | 1069  | 2000 | 0.06       |
| 16      | J THERM ANAL         | 979   | 2000 | 0.01       |
| 17      | ACI MATER J          | 956   | 2004 | 0.05       |
| 18      | COMPOS PART B-ENG    | 914   | 2013 | 0          |
| 19      | WASTE MANAGE         | 841   | 2000 | 0.01       |
| 20      | MATER LETT           | 825   | 2003 | 0.07       |

Table S5. Top 20 cited references in scientific publications on fly ash-based geopolymer.

| Ranking | Count | Centrality | Year | Reference                                                                                 |
|---------|-------|------------|------|-------------------------------------------------------------------------------------------|
| 1       | 157   | 0.03       | 2015 | Singh B, 2015, CONSTR BUILD MATER, V85, P78, DOI<br>10.1016/j.conbuildmat.2015.03.036     |
| 2       | 150   | 0.02       | 2016 | Zhuang XY, 2016, J CLEAN PROD, V125, P253, DOI<br>10.1016/j.jclepro.2016.03.019           |
| 3       | 148   | 0.02       | 2018 | Luukkonen T, 2018, CEMENT CONCRETE RES, V103, P21,<br>DOI 10.1016/j.cemconres.2017.10.001 |
| 4       | 139   | 0.08       | 2014 | Nath P, 2014, CONSTR BUILD MATER, V66, P163, DOI<br>10.1016/j.conbuildmat.2014.05.080     |
| 5       | 125   | 0.05       | 2014 | Ismail I, 2014, CEMENT CONCRETE COMP, V45, P125,<br>DOI 10.1016/j.cemconcomp.2013.09.006  |
| 6       | 114   | 0.03       | 2015 | Provis JL, 2015, CEMENT CONCRETE RES, V78, P110,<br>DOI 10.1016/j.cemconres.2015.04.013   |
| 7       | 113   | 0.01       | 2014 | Deb PS, 2014, MATER DESIGN, V62, P32, DOI<br>10.1016/j.matdes.2014.05.001                 |
| 8       | 109   | 0.02       | 2018 | Provis JL, 2018, CEMENT CONCRETE RES, V114, P40,<br>DOI 10.1016/j.cemconres.2017.02.009   |
| 9       | 103   | 0.07       | 2011 | Somna K, 2011, FUEL, V90, P2118, DOI<br>10.1016/j.fuel.2011.01.018                        |
| 10      | 99    | 0          | 2013 | Turner LK, 2013, CONSTR BUILD MATER, V43, P125,<br>DOI 10.1016/j.conbuildmat.2013.01.023  |
| 11      | 96    | 0.01       | 2007 | Duxson P, 2007, J MATER SCI, V42, P2917, DOI<br>10.1007/s10853-006-0637-z                 |
| 12      | 94    | 0.02       | 2017 | Nath P, 2017, CONSTR BUILD MATER, V130, P22, DOI<br>10.1016/j.conbuildmat.2016.11.034     |
| 13      | 91    | 0.02       | 2015 | Ken PW, 2015, CONSTR BUILD MATER, V77, P370, DOI<br>10.1016/j.conbuildmat.2014.12.065     |
| 14      | 90    | 0.04       | 2013 | Ryu GS, 2013, CONSTR BUILD MATER, V47, P409, DOI<br>10.1016/j.conbuildmat.2013.05.069     |
| 15      | 88    | 0.01       | 2018 | Ma CK, 2018, CONSTR BUILD MATER, V186, P90, DOI<br>10.1016/j.conbuildmat.2018.07.111      |



---

|    |    |      |      |                                                                                             |
|----|----|------|------|---------------------------------------------------------------------------------------------|
| 16 | 87 | 0.03 | 2015 | Nath P, 2015, CEMENT CONCRETE COMP, V55, P205,<br>DOI 10.1016/j.cemconcomp.2014.08.008      |
| 17 | 74 | 0.03 | 2017 | Albitar M, 2017, CONSTR BUILD MATER, V136, P374,<br>DOI 10.1016/j.conbuildmat.2017.01.056   |
| 17 | 74 | 0.01 | 2014 | Gorhan G, 2014, COMPOS PART B-ENG, V58, P371, DOI<br>10.1016/j.compositesb.2013.10.082      |
| 18 | 74 | 0.01 | 2014 | Provis JL, 2014, ANNU REV MATER RES, V44, P299, DOI<br>10.1146/annurev-matsci-070813-113515 |
| 19 | 73 | 0.06 | 2014 | Hanjitsuwan S, 2014, CEMENT CONCRETE COMP, V45,<br>P9, DOI 10.1016/j.cemconcomp.2013.09.012 |

---
